# Supplementary material for: Protein and Carbohydrate Fractionation to Evaluate Perennial Ryegrass (Lolium perenne L.) Accessions
Source: MDPI journal article supplement (doi:10.3390/agronomy14010168), 2024-01-12
Supplement: s1 [file s1]

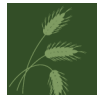

**Supplementary Material**

Table S1: LS-means of first cut carbohydrate and protein fractions and total carbohydrate content of the 20 tested accessions over two years.

| Accession | Carbohydrate fractions (g kg <sup>-1</sup> CHO) |       |             |            | Protein fractions (g kg <sup>-1</sup> N) |           |           |               |            | Total CHO<br>g kg <sup>-1</sup> DM |
|-----------|-------------------------------------------------|-------|-------------|------------|------------------------------------------|-----------|-----------|---------------|------------|------------------------------------|
|           | A                                               | B1    | B2          | C          | A                                        | B1        | B2        | B3            | C          |                                    |
| 1         | 370.5 cdef                                      | 3.1 a | 572.0 abcd  | 54.5 abc   | 276.1 ab                                 | 93.1 abc  | 354.8 a   | 245.0 fg      | 31.0 abcde | 802.9 abcde                        |
| 2         | 379.6 cde                                       | 2.7 a | 565.8bcde   | 51.9 bcde  | 285.8 ab                                 | 95.5 abc  | 333.7 abc | 253.4 defg    | 31.7 abcde | 805.5 abc                          |
| 3         | 378.4 cde                                       | 3.0 a | 568.4 bcd   | 50.3 bcde  | 278.7 ab                                 | 104.3 abc | 322.7 abc | 264.5 abcde   | 29.8 abcde | 787.6 cdefghi                      |
| 4         | 398.7 abc                                       | 3.5 a | 555.0 def   | 42.7 fg    | 256.1 b                                  | 117.0 a   | 323.5 abc | 273.7 abc     | 29.7 abcde | 779.6 fghi                         |
| 5         | 362.9 ef                                        | 3.5 a | 579.1 abc   | 54.6 abc   | 277.3 ab                                 | 89.1 bc   | 349.4 abc | 251.7 efg     | 32.6 ab    | 802.3 abcde                        |
| 6         | 344.5 f                                         | 2.8 a | 593.3 a     | 59.3 a     | 286.6 a                                  | 84.1 c    | 353.2 ab  | 243.1 g       | 33.0 a     | 807.2 ab                           |
| 7         | 372.0 cdef                                      | 3.9 a | 574.1 abcd  | 50.1 bcde  | 263.1 ab                                 | 102.9 abc | 338.7 abc | 267.3 abcde   | 28.1 e     | 774.2 i                            |
| 8         | 376.6 cde                                       | 3.4 a | 573.5 abcd  | 46.6 defg  | 269.0 ab                                 | 104.1 abc | 322.6 abc | 274.5 ab      | 29.8 abcde | 778.2 ghi                          |
| 9         | 411.2 a                                         | 3.4 a | 542.6 f     | 41.2 g     | 277.6 ab                                 | 104.0 abc | 314.8 bc  | 275.4 ab      | 28.2 de    | 796.4 abcdefg                      |
| 10        | 409.5 ab                                        | 3.0 a | 544.2 ef    | 44.9 efg   | 263.1 ab                                 | 105.6 abc | 348.2 abc | 253.9 defg    | 29.2 abcde | 809.1 a                            |
| 11        | 377.1 cde                                       | 3.3 a | 568.5 bcd   | 51.1 bcde  | 270.3 ab                                 | 99.4 abc  | 342.5 abc | 257.4 bcdefg  | 30.3 abcde | 790.0 bcdefghi                     |
| 12        | 379.8 bcde                                      | 3.0 a | 567.5 bcd   | 49.7 bcdef | 270.8 ab                                 | 95.1 abc  | 333.8 abc | 271.4 abcd    | 28.9 bcde  | 788.6 bcdefghi                     |
| 13        | 392.1 abcd                                      | 3.2 a | 557.7 cdef  | 46.0 defg  | 265.8 ab                                 | 109.1 ab  | 330.4 abc | 264.2 abcdef  | 30.5 abcde | 797.0 abcdef                       |
| 14        | 368.3 def                                       | 2.6 a | 575.4 abcd  | 53.7 abc   | 285.7 ab                                 | 90.8 bc   | 331.1 abc | 260.0 abcdefg | 32.4 abc   | 804.9 abc                          |
| 15        | 362.5 ef                                        | 2.7 a | 581.6 ab    | 53.2 abcd  | 277.6 ab                                 | 103.3 abc | 312.6 c   | 277.0 a       | 29.6 abcde | 785.5 defghi                       |
| 16        | 388.4 abcde                                     | 2.8 a | 561.3 bcdef | 47.5 cdefg | 264.5 ab                                 | 103.6 abc | 329.0 abc | 273.8 ab      | 29.1 bcde  | 784.8 efghi                        |
| 17        | 366.7 def                                       | 3.4 a | 575.2 abcd  | 54.5 abc   | 277.8 ab                                 | 92.7 bc   | 341.3 abc | 258.8 abcdefg | 29.4 abcde | 792.9 abcdefgh                     |
| 18        | 379.9 bcde                                      | 3.2 a | 567.5 bcd   | 49.9 bcdef | 272.9 ab                                 | 109.6 ab  | 313.3 c   | 275.8 ab      | 28.6 cde   | 775.3 hi                           |
| 19        | 384.3 abcde                                     | 3.3 a | 563.0 bcdef | 49.2 cdef  | 275.5 ab                                 | 102.7 abc | 340.2 abc | 249.5 efg     | 32.1 abcd  | 804.0 abcd                         |
| 20        | 359.0 ef                                        | 2.7 a | 581.8 ab    | 56.6 ab    | 292.0 a                                  | 90.6 bc   | 331.2 abc | 254.5 cdefg   | 31.8 abcde | 797.8 abcdef                       |
| S.E.      | 5.8                                             | 0.2   | 4.5         | 1.4        | 6.1                                      | 4.7       | 9.0       | 4.7           | 0.8        | 3.4                                |

Means followed by different letter(s) within the same column are different at  $p < 0.05$ ; S.E., standard error.

Table S2: LS-means of first cut and annual total nitrogen content of the 20 tested accessions as affected by site x accession interaction over two years

| Accession | First cut total N (g kg <sup>-1</sup> DM) |         |              | Annual total N (g kg <sup>-1</sup> DM) |         |              |
|-----------|-------------------------------------------|---------|--------------|----------------------------------------|---------|--------------|
|           | Asendorf                                  | Malchow | Hohenschulen | Asendorf                               | Malchow | Hohenschulen |
| 1         | 14.9 cd                                   | 14.7 b  | 20.3 abcde   | 18.3 a                                 | 20.3 a  | 18.7 ab      |
| 2         | 14.7 cd                                   | 15.9 ab | 18.1 bcde    | 18.5 a                                 | 20.3 a  | 18.1 ab      |
| 3         | 15.2 bcd                                  | 17.0 ab | 20.6 abcde   | 18.8 a                                 | 21.6 a  | 18.9 ab      |
| 4         | 17.1 abcd                                 | 17.5 ab | 22.0 ab      | 19.5 a                                 | 22.4 a  | 19.0 ab      |
| 5         | 15.3 bcd                                  | 16.3 ab | 17.6 cde     | 19.0 a                                 | 21.0 a  | 17.7 b       |
| 6         | 14.8 cd                                   | 15.1 b  | 17.4 de      | 18.6 a                                 | 20.5 a  | 18.1 ab      |
| 7         | 15.1 cd                                   | 18.3 ab | 23.5 a       | 18.8 a                                 | 22.3 a  | 21.6 a       |
| 8         | 16.8 abcd                                 | 17.7 ab | 20.2 abcde   | 19.4 a                                 | 21.9 a  | 19.8 ab      |
| 9         | 14.7 cd                                   | 16.5 ab | 20.4 abcde   | 18.5 a                                 | 22.2 a  | 20.2 ab      |
| 10        | 14.2 d                                    | 16.0 ab | 19.0 bcde    | 18.4 a                                 | 21.4 a  | 19.9 ab      |
| 11        | 19.7 a                                    | 17.3 ab | 20.4 abcde   | 21.2 a                                 | 22.0 a  | 21.6 a       |
| 12        | 20.0 a                                    | 16.6 ab | 20.8 abcde   | 21.2 a                                 | 22.1 a  | 18.6 ab      |
| 13        | 18.8 abc                                  | 16.9 ab | 19.3 abcde   | 20.9 a                                 | 21.5 a  | 18.9 ab      |
| 14        | 18.2 abcd                                 | 15.9 ab | 17.4 de      | 20.8 a                                 | 20.9 a  | 19.4 ab      |
| 15        | 18.8 abc                                  | 17.1 ab | 21.1 abcde   | 20.4 a                                 | 20.9 a  | 19.6 ab      |
| 16        | 19.8 a                                    | 17.3 ab | 21.5 abcd    | 20.9 a                                 | 22.2 a  | 20.2 ab      |
| 17        | 19.5 ab                                   | 17.1 ab | 19.8 abcd    | 21.2 a                                 | 21.1 a  | 20.6 ab      |
| 18        | 19.8 a                                    | 19.6 a  | 21.8 abc     | 21.3 a                                 | 23.6 a  | 21.0 ab      |
| 19        | 18.9 abc                                  | 16.4 ab | 17.1 e       | 20.5 a                                 | 21.2 a  | 18.0 ab      |
| 20        | 19.0 abc                                  | 15.7 ab | 18.9 bcde    | 20.4 a                                 | 20.7 a  | 18.4 ab      |
| S.E.      | 0.7                                       |         |              | 0.6                                    |         |              |

Means followed by different letter(s) within the same column are different at  $p < 0.05$ ; S.E., standard error.

2

3
